# Supplementary material for: Efficacy of Surgery for the Treatment of Gastric Cancer Liver Metastases: A Systematic Review of the Literature and Meta-Analysis of Prognostic Factors
Source: MDPI journal article supplement (doi:10.3390/jcm10051141), 2021-03-09

| Study or Subgroup                                                                       | log[Hazard Ratio] | SE   | Weight        | Hazard Ratio<br>IV, Random, 95% CI |
|-----------------------------------------------------------------------------------------|-------------------|------|---------------|------------------------------------|
| Baek 2013                                                                               | 2.31              | 2.99 | 0.2%          | 10.07 [0.03, 3534.38]              |
| Garancini 2012                                                                          | 0.71              | 0.57 | 6.3%          | 2.03 [0.67, 6.22]                  |
| Kawahara 2020                                                                           | -0.56             | 0.63 | 5.1%          | 0.57 [0.17, 1.96]                  |
| Kinoshita 2015                                                                          | 0.24              | 0.16 | 79.6%         | 1.27 [0.93, 1.74]                  |
| Nonaka 2019                                                                             | -0.06             | 0.77 | 3.4%          | 0.94 [0.21, 4.26]                  |
| Tatsubayashi 2016                                                                       | -0.17             | 0.77 | 3.4%          | 0.84 [0.19, 3.82]                  |
| Tsujimoto 2010                                                                          | 0.04              | 1.04 | 1.9%          | 1.04 [0.14, 7.99]                  |
| <b>Total (95% CI)</b>                                                                   |                   |      | <b>100.0%</b> | <b>1.23 [0.93, 1.62]</b>           |
| Heterogeneity: $\tau^2 = 0.00$ ; $\chi^2 = 3.18$ , $df = 6$ ( $P = 0.79$ ); $I^2 = 0\%$ |                   |      |               |                                    |
| Test for overall effect: $Z = 1.44$ ( $P = 0.15$ )                                      |                   |      |               |                                    |

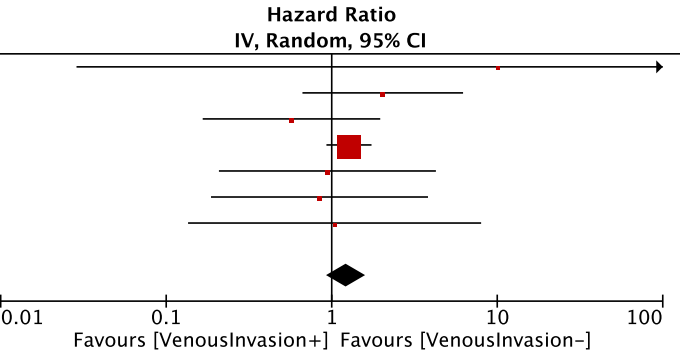

Supplement: s1 [file s1]
